# Supplementary material for: Trifluoromethyl derivatives of canonical nucleosides: synthesis and bioactivity studies
Source: Royal Society of Chemistry journal article supplement (doi:10.1039/c3md00159h), 2013-01-01
Supplement: c3md00159h.pdf [file c3md00159h.pdf]

## Electronic Supporting Information

to the manuscript:

**Trifluoromethyl derivatives of canonical nucleosides: synthesis and bioactivity studies**

by

Domenica Musumeci,<sup>a</sup> Carlo Irace,<sup>b</sup> Rita Santamaria,<sup>b</sup> and Daniela Montesarchio<sup>a,\*</sup>

<sup>a</sup> *Department of Chemical Sciences, Complesso Universitario di Monte S. Angelo, via Cintia, 4,  
University of Napoli "Federico II", I-80126 Napoli, Italy*

<sup>b</sup> *Department of Pharmacy, via Domenico Montesano, 49, University of Napoli "Federico II", I-  
80131 Napoli, Italy.*

Corresponding author's e-mail: [daniela.montesarchio@unina.it](mailto:daniela.montesarchio@unina.it)

*Tel. +39-081-674126*

*FAX +39-081-674393*

## Table of Contents

|                                                  |             |
|--------------------------------------------------|-------------|
| <b>General Methods</b>                           | <b>p. 2</b> |
| <b>Trifluoromethylation of 2'-deoxycytidine</b>  | <b>p. 2</b> |
| <b>Trifluoromethylation of 2'-deoxyadenosine</b> | <b>p. 3</b> |
| <b>Trifluoromethylation of 2'-deoxyguanosine</b> | <b>p. 5</b> |
| <b>Trifluoromethylation of inosine</b>           | <b>p. 6</b> |
| <b>Cell cultures and microcultures bioassay</b>  | <b>p. 7</b> |
| <b>Figure S1: Cell survival index values</b>     | <b>p. 9</b> |

## Experimental Section.

### General Methods.

All the reagents were of the highest commercially available quality and were used as received. TLC analyses were carried out on silica gel plates from Merck (60, F254). Reaction products on TLC plates were visualized by UV light and then by treatment with a 10 %  $\text{Ce}(\text{SO}_4)_2/\text{H}_2\text{SO}_4$  aq. solution. For column chromatography, silica gel from Merck (Kieselgel 40, 0.063-0.200 mm) was used. The following abbreviations were used throughout the text: Ac = acetyl; AcOEt = ethyl acetate; DMAP = 4-dimethylaminopyridine; DMSO = dimethylsulfoxide;  $\text{Et}_2\text{O}$  = diethyl ether; TEA = triethylamine.

$^1\text{H}$  and  $^{13}\text{C}$  NMR spectra were recorded on Varian XR 200 and Varian Inova 500 spectrometers, as specified. All the chemical shifts are expressed in ppm with respect to the residual solvent signal. (for  $^1\text{H}$  NMR:  $\text{CDCl}_3$  = 7.26 ppm;  $\text{CD}_3\text{OD}$  = 3.31 ppm; for  $^{13}\text{C}$  NMR:  $\text{CDCl}_3$  = 76.9 ppm;  $\text{CD}_3\text{OD}$  = 49.5 ppm). Multiplicities are expressed with the following abbreviations: s = singlet; d = doublet; dd = double doublet; t = triplet; m = multiplet. Peak assignments have been carried out on the basis of standard  $^1\text{H}$ - $^1\text{H}$  COSY and HSQC experiments.  $^{19}\text{F}$  NMR spectra were recorded on a Bruker 400 spectrometer at 376 MHz, using  $\text{CF}_3\text{CD}_2\text{OD}$  as internal standard. For the ESI MS analyses, a Waters Micromass ZQ instrument – equipped with an Electrospray source – was used in the positive mode.

### Trifluoromethylation of 2'-deoxycytidine.

To a solution of 2'-deoxycytidine (50 mg, 0.22 mmol, 1 eq) in 1 ml of  $\text{H}_2\text{O}$ ,  $\text{CF}_3\text{SO}_2\text{Na}$  (103 mg, 0.66 mmol, 3 eq) previously dissolved in  $\text{H}_2\text{O}$  (1 ml) and, successively, a 70% aq. solution of *tert*-BuOOH (105  $\mu\text{l}$ , 1.10 mmol, 5 eq) were added at 0 °C. The reaction was then taken to r.t. After 3 h, the reaction was quenched by addition of a satd. aq. solution of  $\text{NaHCO}_3$  (3 ml) and the resulting mixture taken to dryness. The crude was purified on a silica gel column eluted with a gradient from 5 to 15 % of  $\text{CH}_3\text{OH}$  in  $\text{CH}_2\text{Cl}_2$ , giving 47 mg of the target 5- $\text{CF}_3$ -2'-deoxycytidine **2** (0.16 mmol, 73 % yield) and 12 mg (24 %) of the starting material.

**2**:  $R_f = 0.7$  in 8:2  $\text{CH}_2\text{Cl}_2/\text{CH}_3\text{OH}$  (v/v).  $^1\text{H NMR}$  (200 MHz,  $\text{CD}_3\text{OD}$ ):  $\delta$  8.87 [s, 1H, H-6]; 6.20 [t, 1H,  $J = 5.8$  Hz, H-1']; 4.39 [m, 1H, H-3']; 3.98 [m, 1H,  $H_{a-5'}$ ]; 3.81 [m, 1H, H-4']; 3.32 [m, 1H,  $H_{b-5'}$ ]; 2.44 [m, 1H,  $H_{a-2'}$ ]; 2.26 [m, 1H,  $H_{b-2'}$ ].  $^{13}\text{C NMR}$  (50 MHz,  $\text{CD}_3\text{OD}$ ):  $\delta$  162.6 [C-4]; 157.2 [C-2]; 145.4 [C-6]; 125.0 [q,  $J = 267.5$  Hz,  $\text{CF}_3$ ]; 98.5 [q,  $J = 35.4$  Hz, C-5]; 89.7 [C-4']; 88.8 [C-1']; 71.6 [C-3']; 62.3 [C-5']; 43.0 [C-2'].  $^{19}\text{F NMR}$  (376 MHz,  $\text{CD}_3\text{OD}$ ):  $\delta$  15.2 [s, reference:  $\text{CF}_3\text{CD}_2\text{OD}$ ]. **ESI-MS** (positive ions): for  $\text{C}_{10}\text{H}_{13}\text{F}_3\text{N}_3\text{O}_4$ , calcd.: 296.09; found 296.02 ( $\text{M}+\text{H}^+$ ); for  $\text{C}_{10}\text{H}_{12}\text{F}_3\text{N}_3\text{O}_4\text{Na}$ , calcd.: 318.07; found 318.47 ( $\text{M}+\text{Na}^+$ ).

**Synthesis of 2 on a large scale.** To a solution of 2'-deoxycytidine (0.50 g, 2.20 mmol, 1 eq) in 3 ml of  $\text{H}_2\text{O}$ ,  $\text{CF}_3\text{SO}_2\text{Na}$  (1.03 g, 6.60 mmol, 3 eq) dissolved in  $\text{H}_2\text{O}$  (5 ml) was added, followed by a 70% aq. solution of *tert*-BuOOH (1.05 ml, 11.0 mmol, 5 eq) which was added dropwise to the mixture at 0 °C. Then the reaction was then taken to r.t. After 6 h, the reaction was quenched by addition of a satd. aq. solution of  $\text{NaHCO}_3$  (3 ml) until neutralization, and the resulting mixture taken to dryness. The crude was then resuspended in  $\text{CH}_3\text{OH}$ , aided by sonication, and filtered off to eliminate the  $\text{NaHCO}_3$  solid precipitate. The filtered solution was purified on a silica gel column eluted with a gradient from 5 to 15 % of  $\text{CH}_3\text{OH}$  in  $\text{CH}_2\text{Cl}_2$ , giving 440 mg of the target 5- $\text{CF}_3$ -2'-deoxycytidine **2** (1.49 mmol, 68 % yield) and 127 mg (26 %) of the starting nucleoside.

### Trifluoromethylation of 2'-deoxyadenosine.

**Synthesis of 3',5'-*O*-diacetyl-2'-deoxyadenosine.** 2'-deoxyadenosine (**5a**, 200 mg, 0.80 mmol, 1.0 eq) was coevaporated twice and then suspended in anhydrous acetonitrile (5.0 ml). To the white suspension, DMAP (7.8 mg, 0.064 mmol, 0.08 eq), TEA (293  $\mu\text{l}$ , 2.10 mmol, 2.6 eq) and acetic anhydride (180  $\mu\text{l}$ , 1.91 mmol, 2.4 eq) were added, under stirring, in the order. After 3 h, the reaction was quenched by addition of methanol (3 ml) and taken to dryness under reduced pressure. The crude was partitioned between  $\text{CH}_2\text{Cl}_2$  (10 mL) and water (10 mL), the organic phase was separated and the aqueous layer was back-extracted five times with  $\text{CH}_2\text{Cl}_2$  (5 x 10 mL). The combined organic phases were then taken to dryness and redissolved in few drops of  $\text{CH}_2\text{Cl}_2$ . Addition to the mixture of *n*-hexane/ $\text{Et}_2\text{O}$  1:1 (v/v) led to the formation of a white precipitate, which afforded 242 mg (0.72 mmol, 90 % yield) of desired product **6a**. The identity and purity of the isolated product were confirmed by  $^1\text{H}$  and  $^{13}\text{C}$ -NMR spectra and by ESI-MS spectra (data not shown).

**Trifluoromethylation of 3',5'-*O*-diacetyl-2'-deoxyadenosine.** To a solution of **6a** (90 mg, 0.27 mmol, 1.0 eq) in CH<sub>2</sub>Cl<sub>2</sub> (5 ml), CF<sub>3</sub>SO<sub>2</sub>Na (63 mg, 0.40 mmol, 1.5 eq), previously dissolved in water (2.0 ml), and, subsequently, *tert*-ButOOH (70% aq. solution, 65 μL, 0.67 mmol, 2.5 equiv) were added dropwise at 0 °C under stirring. The reaction, monitored by TLC, was then taken at room temperature for 4 h. Further additions of the reactants CF<sub>3</sub>SO<sub>2</sub>Na (63 mg, 1.5 eq) and *tert*-BuOOH (65 μL, 2.5 equiv) were performed after additional 4, 24, 36 and 48 h. After 60 h the reaction mixture was partitioned between CH<sub>2</sub>Cl<sub>2</sub> (20 mL) and a satd. aq. NaHCO<sub>3</sub> solution (20 mL). The organic layer was separated, and the aqueous phase was extracted with CH<sub>2</sub>Cl<sub>2</sub> (3x 10 mL). The combined organic layers were concentrated and purified by column chromatography on silica gel. Elution with a gradient of AcOEt in CH<sub>2</sub>Cl<sub>2</sub> (from 30 to 40%) allowed the isolation of target compound **7a** (21 mg, 0.051 mmol, 19 % yield). In addition to the desired product, more apolar compounds could be isolated, identified by <sup>1</sup>H and <sup>13</sup>C NMR (data not shown) as the compounds derived by *N*-glycosidic bond cleavage in the trifluoromethylated nucleoside. Finally, elution of the column with CH<sub>2</sub>Cl<sub>2</sub>/CH<sub>3</sub>OH 9:1 (v/v) afforded 30 mg (0.090 mmol, 33%) of the starting nucleoside **6a**. Thus trifluoromethylated nucleoside **7a**, taking into account the recyclable starting material, was obtained with a recovery yield of 28 %.

**7a:** R<sub>f</sub> = 0.4 in 1:1 CH<sub>2</sub>Cl<sub>2</sub>/AcOEt (v/v). <sup>1</sup>H NMR (200 MHz, CDCl<sub>3</sub>): δ 8.40 [s, 1H, H-2]; 6.39 [dd, *J* = 7.6 and 6.4 Hz, 1H, H-1']; 5.93 [bs, 2H, NH<sub>2</sub>-6]; 5.62 [m, 1H, H-3']; 4.60 – 4.28 [overlapped signals, 3H, H-4' and H<sub>2</sub>-5']; 3.74 [m, 1H, H-2'<sub>a</sub>]; 2.44 [m, 1H, H-2'<sub>b</sub>]; 2.14 and 2.06 (s's, 3H each, 2x CH<sub>3</sub>CO). <sup>13</sup>C NMR (50 MHz, CD<sub>3</sub>OD): δ 170.5 and 170.2 [2x CH<sub>3</sub>CO]; 156.3 [C-6]; 154.5 [C-2]; 150.9 [C-4]; 141.7 [q, *J* = 41 Hz, C-8]; 118.5 [C-5]; 118.3 [q, *J* = 270 Hz, CF<sub>3</sub>]; 85.3 [C-1']; 82.9 [C-4']; 74.5 [C-3']; 63.4 [C-5']; 35.1 [C-2']; 20.9 and 20.7 [2x CH<sub>3</sub>CO]. <sup>19</sup>F NMR (376 MHz, CD<sub>3</sub>OD): δ 15.9 [s, reference: CF<sub>3</sub>CD<sub>2</sub>OD]. **ESI-MS** (positive ions): for C<sub>15</sub>H<sub>16</sub>F<sub>3</sub>N<sub>5</sub>O<sub>5</sub>Na, calcd: 426.10; found 426.60 (M+Na<sup>+</sup>).

**Synthesis of 8-CF<sub>3</sub>-2'-deoxyadenosine.** Compound **7a** (20 mg, 0.049 mmol) was dissolved in 2.0 ml of 7 N methanolic ammonia at 0 °C and the reaction was kept at 4 °C for 20 h. Then, the crude was taken to dryness and purified by column chromatography. Elution of the silica gel column with increasing amounts of CH<sub>3</sub>OH in CH<sub>2</sub>Cl<sub>2</sub> (from 1 to 5 %) afforded 16 mg of compound **8a** (0.048 mmol), pure from TLC and NMR control, in 98% yield.

**8a:** R<sub>f</sub> = 0.4 in 9:1 CH<sub>2</sub>Cl<sub>2</sub>/CH<sub>3</sub>OH (v/v). <sup>1</sup>H NMR (500 MHz, CD<sub>3</sub>OD): δ 8.24 [s, 1H, H-2]; 6.45 [dd, *J* = 6.0 and 6.0 Hz, 1H, H-1']; 4.64 [d, *J* = 5.5 Hz, 1H, H-3']; 4.13 [bs, 1H, H-4']; 3.92 – 3.75

[AB part of an ABX system,  $J = 12.5$  and  $3.0$  Hz, 2H, H<sub>2</sub>-5']; 3.10 [m, 1H, H-2'<sub>a</sub>]; 2.31 [dd,  $J = 13.0$  and  $5.5$  Hz, 1H, H-2'<sub>b</sub>]. <sup>13</sup>C NMR (125 MHz, CD<sub>3</sub>OD):  $\delta$  159.5 [C-6]; 155.8 [C-2]; 151.7 [C-4]; 139.1 [q,  $J = 39$  Hz, C-8]; 120.6 [q,  $J = 269$  Hz, CF<sub>3</sub>]; 120.4 [C-5]; 91.4 [C-1']; 88.9 [C-4']; 74.1 [C-3']; 64.8 [C-5']; 41.4 [C-2']. <sup>19</sup>F NMR (376 MHz, CD<sub>3</sub>OD):  $\delta$  15.6 [s, reference: CF<sub>3</sub>CD<sub>2</sub>OD]. ESI-MS (positive ions): for C<sub>11</sub>H<sub>12</sub>F<sub>3</sub>N<sub>5</sub>O<sub>3</sub>Na, calcd: 342.08; found 342.98 (M+Na<sup>+</sup>).

### Trifluoromethylation of 2'-deoxyguanosine.

**Synthesis of 3',5'-O-diacetyl-2'-deoxyguanosine.** To a suspension of 2'-deoxyguanosine (400 mg, 1.40 mmol) in anhydrous CH<sub>3</sub>CN (10 mL), DMAP (14 mg, 0.12 mmol), TEA (514  $\mu$ L, 3.7 mmol) and acetic anhydride (1.65 mL, 3.34 mmol) were sequentially added at rt under stirring. After 2 h, the reaction was quenched by addition of methanol and the solvent completely evaporated. The residue was resuspended in diethyl ether aided by sonication. The obtained white precipitate was collected by filtration and washed with several volumes of Et<sub>2</sub>O/ethanol 9:1 (v/v) and successively dried under reduced pressure, affording 467 mg (1.33 mmol, 95% yield) of the target derivative **6b**. The identity and purity of the isolated product were confirmed by <sup>1</sup>H and <sup>13</sup>C-NMR spectra and by ESI-MS spectra (data not shown).

### Trifluoromethylation of 3',5'-O-diacetyl-2'-deoxyguanosine.

To a suspension of nucleoside **6b** (67 mg, 0.19 mmol) in CH<sub>2</sub>Cl<sub>2</sub> (5.0 mL) and H<sub>2</sub>O (3.0 mL), CF<sub>3</sub>SO<sub>2</sub>Na (89 mg, 0.57 mmol, 3 eq) dissolved in H<sub>2</sub>O (1.0 mL) was added under stirring. Then a solution of *tert*-ButOOH (70% aq. solution, 90  $\mu$ L, 0.95 mmol, 5 eq) was added dropwise at 0 °C under stirring. After 24 h a further aliquot of CF<sub>3</sub>SO<sub>2</sub>Na (3 eq) and *tert*-ButOOH (5 eq) was added to the reaction mixture. After 48 h, the reaction was quenched by addition of a satd. aq. NaHCO<sub>3</sub> solution until neutralization and the biphasic system was transferred into a separatory funnel and diluted with CH<sub>2</sub>Cl<sub>2</sub> and H<sub>2</sub>O. The organic phase was separated and the aqueous layer was back-extracted five times with CH<sub>2</sub>Cl<sub>2</sub> (5 x 10 mL). The combined organic phases were then taken to dryness and the crude was purified by silica gel chromatography, eluting the column with a gradient of CH<sub>3</sub>OH in CH<sub>2</sub>Cl<sub>2</sub> (from 0 to 10%), affording 31 mg (0.074 mmol, 39% yield) of target derivative **7b**.

**7b**:  $R_f = 0.40$  in 9:1 ( $\text{CH}_2\text{Cl}_2/\text{CH}_3\text{OH}$ , v/v).  $^1\text{H NMR}$ : (500 MHz,  $\text{CDCl}_3$ ):  $\delta$  6.87 [bs,  $\text{NH}_2$ -2]; 6.25 [dd,  $J = 6.5$  and  $7.5$  Hz, 1H, H-1']; 5.51 [m, 1H, H-3']; 4.70 [m, 1H, H-5'<sub>a</sub>]; 4.40 [m, 1H, H-5'<sub>b</sub>]; 4.34 [m, 1H, H-4']; 3.47 [m, 1H, H-2'<sub>a</sub>]; 2.41 [m, 1H, H-2'<sub>b</sub>]; 2.14 and 2.01 [s's, 3H each, 2x  $\text{CH}_3\text{CO}$ ].  $^{13}\text{C NMR}$  (125 MHz,  $\text{CDCl}_3$ ):  $\delta$  171.1 [ $\text{CH}_3\text{CO}$ ]; 170.2 [ $\text{CH}_3\text{CO}$ ]; 159.1 [C-6]; 154.3 [C-2]; 152.6 [C-4]; 134.6 [q,  $J = 41$  Hz, C-8]; 118.5 [q,  $J = 269$  Hz,  $\text{CF}_3$ ]; 116.6 [C-5]; 85.5 [C-1']; 82.8 [C-4']; 74.6 [C-3']; 63.4 [C-5']; 35.1 [C-2']; 21.0 and 20.8 [2x  $\text{CH}_3\text{CO}$ ].  $^{19}\text{F NMR}$  (376 MHz,  $\text{CDCl}_3$ ):  $\delta$  16.1 [s, reference:  $\text{CF}_3\text{CD}_2\text{OD}$ ]. **ESI-MS** (positive ions): for  $\text{C}_{15}\text{H}_{16}\text{F}_3\text{N}_5\text{O}_6$ , calcd. 419.11; found 420.85 ( $\text{M}+\text{H}^+$ ).

### Synthesis of 8- $\text{CF}_3$ -2'-deoxyguanosine.

Compound **7b** (25 mg, 0.059 mmol) was dissolved in 2.0 ml of 7 N methanolic ammonia at 0 °C and the reaction was kept at 4 °C for 24 h. Then, the solvent was evaporated and the crude was purified by silica gel column chromatography, eluting the column with increasing amounts of  $\text{CH}_3\text{OH}$  (from 2 to 10 %) in  $\text{CH}_2\text{Cl}_2$ . Target nucleoside **8b** was obtained in an almost quantitative yield (20 mg, 0.059 mmol), pure from TLC and NMR control.

**8b**:  $R_f = 0.45$  in 85:15 ( $\text{CH}_2\text{Cl}_2/\text{CH}_3\text{OH}$ , v/v).  $^1\text{H NMR}$ : (500 MHz,  $\text{CD}_3\text{OD}$ ):  $\delta$  6.30 [dd,  $J = 7.5$  and  $7.5$  Hz, 1H, H-1']; 4.61 [m, 1H, H-3']; 4.05 [dd,  $J = 3.5$  and  $6.0$  Hz, 1H, H-4']; 3.90 - 3.65 [AB part of an ABX system,  $J = 12.5$  and  $3.5$  Hz, 2H, H-5']; 3.15 [m, 1H, H-2'<sub>a</sub>]; 2.25 [A part of an ABX system,  $J = 2.5$  and  $6.0$  Hz, 1H, H-2'<sub>b</sub>].  $^{13}\text{C NMR}$  (125 MHz,  $\text{CD}_3\text{OD}$ ):  $\delta$  160.0 [C-6]; 157.3 [C-2]; 156.2 [C-4]; 136.5 [q,  $J = 41$  Hz, C-8]; 121.2 [q,  $J = 269$  Hz,  $\text{CF}_3$ ]; 118.5 [C-5]; 90.5 [C-1']; 87.9 [C-4']; 73.7 [C-3']; 64.4 [C-5']; 40.3 [C-2'].  $^{19}\text{F NMR}$  (376 MHz,  $\text{CD}_3\text{OD}$ ):  $\delta$  15.0 [s, reference:  $\text{CF}_3\text{CD}_2\text{OD}$ ]. **ESI-MS** (positive ions): for  $\text{C}_{11}\text{H}_{12}\text{F}_3\text{N}_5\text{O}_4\text{Na}$ , calcd: 358.07; found 358.67 ( $\text{M}+\text{Na}^+$ ).

### Trifluoromethylation of inosine.

#### Synthesis of 8- $\text{CF}_3$ -inosine.

To a solution of inosine (50 mg, 0.19 mmol, 1 eq) in 1.5 ml of  $\text{H}_2\text{O}$ ,  $\text{CF}_3\text{SO}_2\text{Na}$  (87 mg, 0.56 mmol, 3 eq) previously dissolved in  $\text{H}_2\text{O}$  (1 ml) and, successively, a 70% aq. solution of *tert*-BuOOH (90  $\mu\text{l}$ , 0.95 mmol, 5 eq) were added at 0 °C. The reaction was then taken to r.t. and, after 6 h, a second portion of  $\text{CF}_3\text{SO}_2\text{Na}$  (87 mg in 1 ml  $\text{H}_2\text{O}$ ) and *tert*-BuOOH (90  $\mu\text{l}$ ) was added to the

reaction mixture at 0 °C. TLC control after 24 h revealed the formation of a new product, with higher  $R_f$  than the starting material. The reaction was quenched by addition of a satd. aq. solution of  $\text{NaHCO}_3$  (3 ml) and the resulting mixture taken to dryness. The crude was resuspended in  $\text{CH}_3\text{OH}$ , aided by sonication, and filtered off to remove the precipitate. The filtered solution was purified on a silica gel column eluted with a gradient from 5 to 15 % of  $\text{CH}_3\text{OH}$  in  $\text{CH}_2\text{Cl}_2$ , giving 46 mg of the target compound **9** (0.16 mmol, 73 % yield).

**9**:  $R_f = 0.5$  in 8:2  $\text{CH}_2\text{Cl}_2/\text{CH}_3\text{OH}$  (v/v).  $^1\text{H NMR}$  (500 MHz,  $\text{D}_2\text{O}$ ):  $\delta$  8.33 [s, 1H, H-2]; 6.13 [d,  $J = 6.0$  Hz, 1H, H-1']; 5.12 [apparent t,  $J = 6.0$  and 6.0 Hz, 1H, H-2']; 4.56 [dd,  $J = 3.0$  and 6.0 Hz, 1H, H-3']; 4.32 [dd,  $J = 3.0$  and 4.0 Hz, 1H, H-4']; 3.98 – 3.90 [AB part of an ABX system,  $J = 12.5$  and 4.0 Hz, 2H, H<sub>2</sub>-5'].  $^{13}\text{C NMR}$  (125 MHz,  $\text{D}_2\text{O}$ ):  $\delta$  160.9 [C-6]; 151.6 [C-4]; 147.5 [C-2]; 140.8 [C-8]; 125.1 [C-5]; 124.5 [q,  $J = 270$  Hz,  $\text{CF}_3$ ]; 90.6 [C-1']; 87.4 [C-4']; 74.1 [C-2']; 71.3 [C-3']; 64.3 [C-5'].  $^{19}\text{F NMR}$  (376 MHz,  $\text{CD}_3\text{OD}$ ):  $\delta$  15.9 [s, reference:  $\text{CF}_3\text{CD}_2\text{OD}$ ]. **ESI-MS** (positive ions): for  $\text{C}_{11}\text{H}_{11}\text{F}_3\text{N}_4\text{O}_5\text{Na}$ , calcd: 359.06; found 360.01 ( $\text{M}+\text{Na}^+$ ).

### Cell cultures and microcultures bioassay.

The biological activity of the trifluoromethylated nucleosides was investigated on tumour MCF-7 human breast adenocarcinoma cells, DU-145 human prostate cancer cells and C6 rat glioma cell line, and on non tumour HaCaT human skin keratinocytes and L6 rat myoblasts, all purchased from ATCC® (American Type Culture Collection, Manassas, Virginia, USA). DU-145, C6, HaCaT and L6 cells were grown in Dulbecco's modified Eagle's medium (DMEM, Invitrogen, Paisley, UK) containing high glucose (4.5 g/l), while MCF-7 cells were grown in RPMI 1640 medium (Invitrogen, Paisley, UK). Media were supplemented with 10% fetal bovine serum (FBS, Cambrex, Verviers, Belgium), L-glutamine (2 mM, Sigma, Milan, Italy), penicillin (100 units/ml, Sigma) and streptomycin (100  $\mu\text{g}/\text{ml}$ , Sigma), according to ATCC recommendations. All cells were cultured in a humidified 5%  $\text{CO}_2$  atmosphere at 37 °C. For bioactivity and cytotoxicity studies, cells were seeded in a 96-microwell culture plates at density of  $10^4$  cells/well. Cells were allowed to grow for 24 h, then the medium was replaced with fresh medium and cells were treated for further 48 h with different concentrations of the tested compounds. In detail, compounds **2**, **8a** and **8b** were dissolved in  $\text{H}_2\text{O}$  and 1 or 2  $\mu\text{L}$  of aqueous solutions were added to cell culture medium to give various concentration ranging from 1 to 250  $\mu\text{M}$ . Positive control for cytotoxicity was performed using cisplatin (purchased from Sigma). Live/dead cell number was determined by the trypan blue dye exclusion test. Briefly, after the treatments, the medium was removed and the cells were washed



twice with PBS buffer solution (Sigma) and then incubated with a trypsin-EDTA solution (Sigma) at 37°C for 5 min. Trypsin was inactivated by re-suspending the cells in medium containing 10% FBS (Cambrex). The cells were pelleted at 250 x g and resuspended in PBS. Viable cells, cells that excluded 0.4% trypan blue (Sigma), were then counted with a Burker haemocytometer chamber. Concurrently, cell viability was evaluated with an MTT assay procedure, which measures the level of mitochondrial dehydrogenase activity using 3-(4,5-dimethyl-2-thiazolyl)-2,5-diphenyl-2H-tetrazolium bromide (MTT, Sigma) as substrate. The assay was based on the redox ability of living mitochondria to convert dissolved MTT into insoluble formazan. In brief, after treatments with the tested compounds, the medium was removed and the cells were incubated with 20 µL/well of an MTT solution (5 mg/mL) for 1 h in a humidified 5% CO<sub>2</sub> incubator at 37°C. The incubation was stopped by removing the MTT solution and by adding 100 µL/well of DMSO to solubilize the formazan. Finally, the absorbance was monitored at 550 nm by using a Perkin-Elmer LS 55 Luminescence Spectrometer (Perkin-Elmer Ltd, Beaconsfield, UK). The antiproliferative activity of the investigated nucleosides was reported by a “cell survival index”, arising from the combination of cell viability evaluation with cell counting. The calculation of the concentration required to inhibit the net increase in the 48 h cell count and viability by 50% (IC<sub>50</sub>) is based on plots of data carried out in triplicates and repeated three times. The IC<sub>50</sub> values against various different tumour cell lines were investigated using standard *in vitro* antiproliferation assays and were obtained using a dose response curve by nonlinear regression using a curve fitting program, GraphPad Prism 5.0, and are expressed as mean ± SEM.

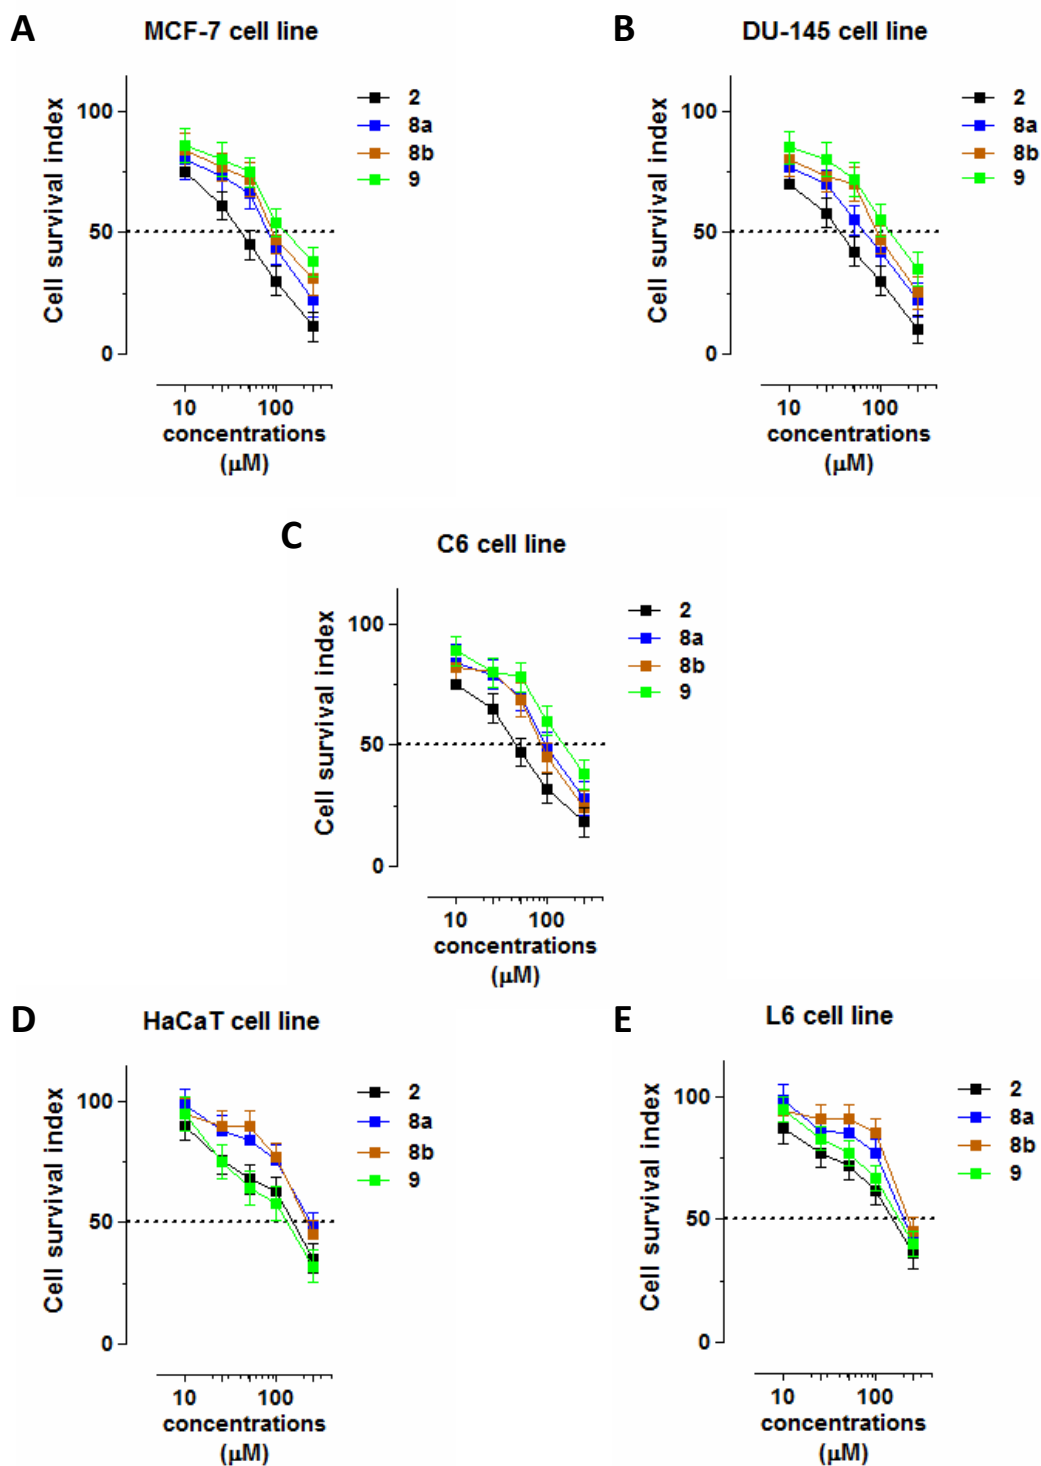

**FIGURE S1.** Cell survival index values, evaluated by MTT assay and total cell count, in MCF-7 (panel A), DU-145 (panel B), C6 (panel C), HaCaT (panel D) and L6 (panel E) cell lines incubated for 48 h with different concentrations of compounds **2**, **8a**, **8b** and **9**, as indicated in the legends. Data are expressed as percentage of untreated control cells and are reported as mean of three independent experiments  $\pm$  SEM ( $n=3$ ).
